# Supplementary material for: Design and Evaluation of Engineered Extracellular Vesicle (EV)-Based Targeting for EGFR-Overexpressing Tumor Cells Using Monobody Display
Source: MDPI journal article supplement (doi:10.3390/bioengineering9020056), 2022-01-29
Supplement: s1 [file s1]

Article

# Design and Evaluation of Engineered Extracellular Vesicle (EV)-based Targeting for EGFR-Overexpressing Tumor Cells using Monobody Display

Hiroaki Komuro <sup>1,2</sup>, Shakhlo Aminova <sup>1,2</sup>, Katherine Lauro <sup>1,2</sup>, Daniel Woldring <sup>1,3</sup> and Masako Harada <sup>1,2 \*</sup>

## Supplementary Materials:

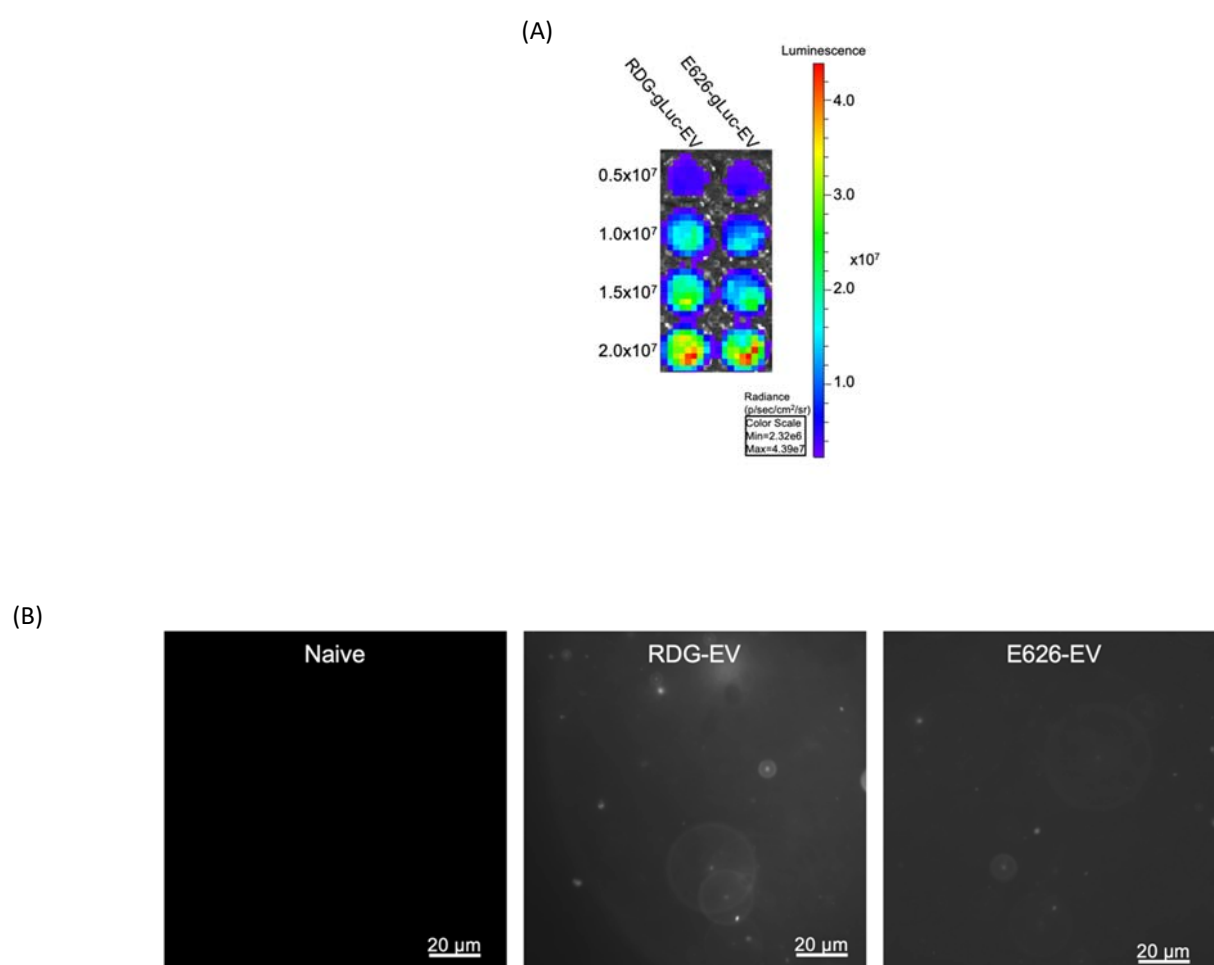

**Figure S1.** Assessment of EV labeling (A) Bioluminescence radiance measurement of E626-gLuc EVs and RDG-gLuc EVs (B) Direct Fluorescence microscopic image of Naïve EVs, E626-mCherry EVs and RDG-mCherry EVs.

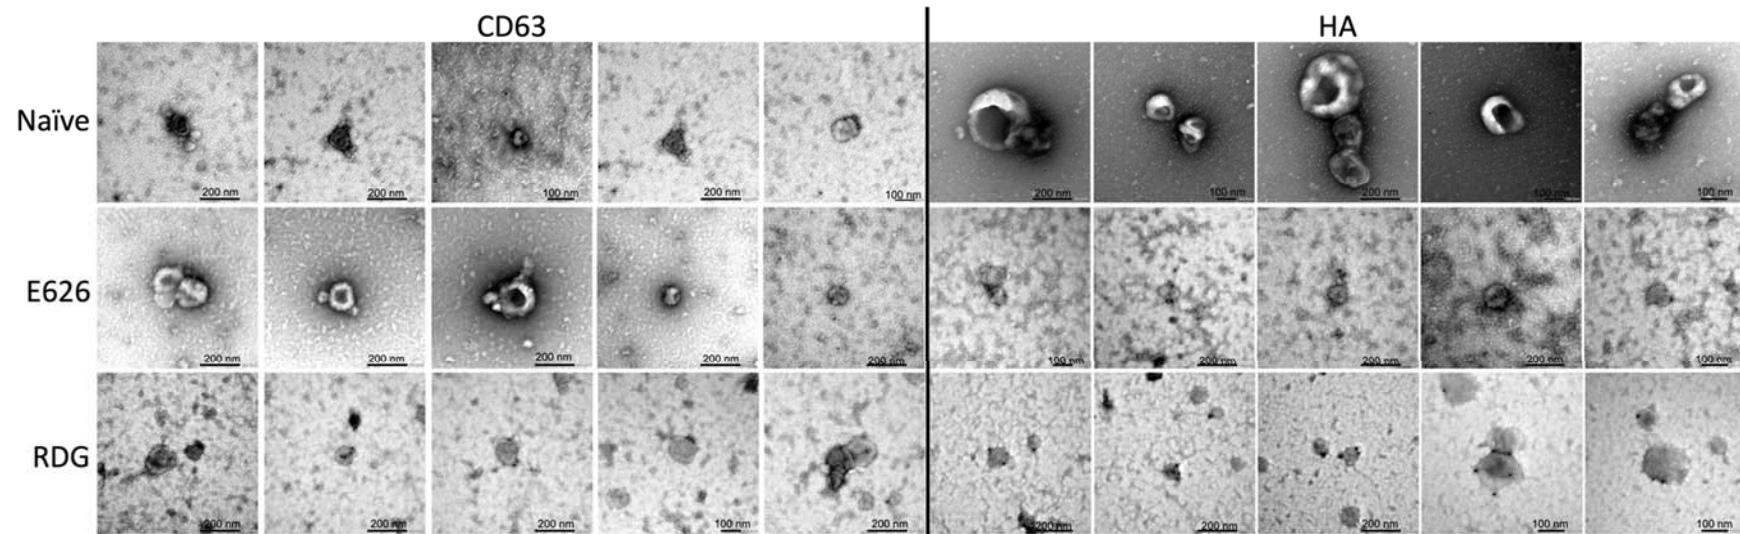

**Figure S2.** Immuno-Transmission electron microscopy (Immuno-TEM) images of CD63 or HA labeled naïve EVs, E626-EVs and RDG-EVs.

**Table S1.** The list of DNA sequences used in this study

| Primer                  | Sequence (5'-3')                                                                                                                                                                                                                                                                                                                              | Template          |
|-------------------------|-----------------------------------------------------------------------------------------------------------------------------------------------------------------------------------------------------------------------------------------------------------------------------------------------------------------------------------------------|-------------------|
| C1C2-F                  | GAATGTGTCGAGCCACTGGG                                                                                                                                                                                                                                                                                                                          | pcS-C1C2 backbone |
| HA-R                    | AGCATAATCTGGAACATCATATGG                                                                                                                                                                                                                                                                                                                      |                   |
| Synthetic DNA Fragments |                                                                                                                                                                                                                                                                                                                                               |                   |
| RDG gBlock              | GTTCCAGATTATGCTTCCTCCGACTCTCCGCGTAACCTGGAGGTTACCAACGCAACTCCGAACTCTCTGACTATTTCTTGGGATGCGCCGGCTGTTACCGTACGTTACTACCGTATCACCTACGGCGAAACTGGTGGTAACTCCCCGAGCCAGGAATTCAGTGTTCGGGTTTCGCGCTCTACCGCGACCATCAGCGGTCTGAAACCGGGCCAGGATTATACCATTACCGTGTACGCTGTAACCGGTCGCGACGGCAGCCCGGCGTCCAGCCGTCCAATCAGCATCAATTATCGCACCGAAATCGACAAACCGTCTCAGGGTGGAGGCGGTTCA | RDG monobody      |
| E626 gBlock             | gttccagattatgctAGCAGCGATAGCCCGCGCAACCTGGAAGTGACCAACGCGACCCCGAACA GCCTGACCATTAGCTGGTTTGATTATGCGGTGACCTATTATCGCATTACCTATGGCGAAACC GGCGGCAACAGCCCCGAGCCAGGAATTTACCGTGCCGGGCTGGATTAGCACCGCGACCATTA GCGGCCTGAAACCGGGCCAGGATTATACCATTACCGTGTATGCGGTGACCGATAACAGCCA TTGGCCGTTTCGCAGCACCCCGATTAGCATTA ACTATCGCACCGAAATTGATAAACCGAGCCAGGGTGGAGGCGGTTCA | E626 monobody     |
| PAS Linker              | GGTGGAGGCGGTTTCAGGCGGAGGTGGCTCTGGCGGTGGCGGATCGGCCTCTCCAGCTGCACCTGCTCCAGCAAGCCCTGCTGCACCAGCTCCGTCTGCTCCTGCTGCCTCTCCAGCTGCACCTGCTCCAGCTTCTCCAGCAGCTCCTGCACCTAGTGCTCCTGCTGAATGTGTCGAGCCA                                                                                                                                                         | G4S-PAS Linker    |
